# Supplementary material
Source: PubMed Central journal article supplement (PMC10947786)
Supplement: NIHMS1971791-supplement-Supporting_Information.pdf [file NIHMS1971791-supplement-Supporting_Information.pdf]

## Supplementary Information

### **High-Yield Lasso Peptide Production in a *Burkholderia* Bacterial Host by Plasmid Copy Number Engineering**

Hannah N. Fernandez,<sup>1</sup> Ashley Kretsch,<sup>2</sup> Sylvia Kunakom,<sup>1</sup> Adjo E. Kadjo,<sup>1</sup> Douglas A. Mitchell,<sup>2</sup>  
Alessandra S. Eustáquio<sup>1\*</sup>

<sup>1</sup>Department of Pharmaceutical Sciences and Center for Biomolecular Sciences, College of Pharmacy, University of Illinois at Chicago, Chicago, IL 60607, USA

<sup>2</sup>Department of Chemistry and Carl R. Woese Institute for Genomic Biology, University of Illinois at Urbana-Champaign, Urbana, IL 61801, USA

## Table of Contents

|                                                                                                                                                                    |        |
|--------------------------------------------------------------------------------------------------------------------------------------------------------------------|--------|
| <b>Table S1.</b> Previously reported heterologous production of lasso peptides from <i>Pseudomonadota</i>                                                          | S4, 5  |
| <b>Table S2.</b> Identified differences between the reference genome and either pSK020 outlier overproducer or pSK020+48 low producer                              | S6–8   |
| <b>Table S3.</b> Primer sequence list for plasmid construction requiring PCR                                                                                       | S9, 10 |
| <b>Figure S1.</b> Schematic of pSK020+48 plasmid and sequence of the promoter region                                                                               | S11    |
| <b>Figure S2.</b> Plasmid is not the only factor contributing to the overproducer phenotype                                                                        | S11    |
| <b>Figure S3.</b> Assessment of the overproducer clone's ability to recapitulate high yield capistrain production when used as a heterologous host                 | S12    |
| <b>Figure S4.</b> Normalized copy number of different replicons in <i>Burkholderia</i> sp. FERM BP-3421                                                            | S12    |
| <b>Figure S5.</b> Generation of pKAE001 and pHNF011                                                                                                                | S13    |
| <b>Figure S6.</b> Comparison of cell density between production cultures of <i>Burkholderia</i> sp. FERM BP-3421 harboring alternate capistrain expression vectors | S14    |
| <b>Figure S7.</b> Generation of pHNF021                                                                                                                            | S15    |
| <b>Figure S8.</b> Production of capistrain in wild-type and spliceostatin-defective mutant of <i>Burkholderia</i> sp. FERM BP-3421                                 | S16    |
| <b>Figure S9.</b> Sequence similarity networks of predicted lasso core peptides                                                                                    | S17    |
| <b>Figure S10.</b> HR-ESI-MS/MS of purified mycetolassin-15                                                                                                        | S18    |
| <b>Figure S11.</b> HR-ESI-MS/MS of purified mycetolassin-18                                                                                                        | S19    |
| <b>Figure S12.</b> Proteolytic resistance of purified mycetolassins                                                                                                | S20    |
| <b>Figure S13.</b> Hydrogen-deuterium exchange of mycetolassin-15 and mycetolassin-18                                                                              | S21    |
| <b>Figure S14.</b> Generation of pHNF007 and pHNF010                                                                                                               | S22    |
| <b>Figure S15.</b> Growth curve comparison between production with alternate <i>mls</i> expression vectors                                                         | S22    |
| <b>Figure S16.</b> Export of mycetolassins with and without inclusion of transporter gene                                                                          | S23    |

|                                                                                                                                       |         |
|---------------------------------------------------------------------------------------------------------------------------------------|---------|
| <b>Figure S17.</b> Production of mycetolassins in <i>E. coli</i>                                                                      | S24     |
| <b>Figure S18.</b> Inhibition of transcription and/or translation assessed by cell free<br>production of mCherry                      | S25     |
| <b>Figure S19.</b> Sequences of mycetolassin genetic constructs <i>mlsA<sub>1</sub>A<sub>2</sub>B</i> , <i>mlsC</i> , and <i>mlsD</i> | S25–27  |
| <b>References</b>                                                                                                                     | S28, 29 |

**Table S1. Previously reported heterologous production of lasso peptides from Pseudomonadota.**

| Source of BGC (Genus)                | Class and Family of BGC Source            | G+C (%) | Host Used                                   | Class and Family of Host                  | G+C (%) | Inducer                                                                                      | Codon Optimized | Yield (mg/L)                                                | Compound              | Ref |
|--------------------------------------|-------------------------------------------|---------|---------------------------------------------|-------------------------------------------|---------|----------------------------------------------------------------------------------------------|-----------------|-------------------------------------------------------------|-----------------------|-----|
| <i>Asticcacaulis</i>                 | Alphaproteobacteria<br>Caulobacteraceae   | 60      | <i>E. coli</i>                              | Gammaproteobacteria<br>Enterobacteriaceae | 50      | anhydrotetracycline                                                                          | no              | 0.26                                                        | astexin-1             | 1   |
| <i>Asticcaucalis</i>                 | Alphaproteobacteria<br>Caulobacteraceae   | 60      | <i>E. coli</i>                              | Gammaproteobacteria<br>Enterobacteriaceae | 50      | ?                                                                                            | ?               | 0.28                                                        | benenodin I and II    | 2,3 |
| <i>Brevundimonas</i>                 | Alphaproteobacteria<br>Caulobacteraceae   | 63      | <i>S. subterranea</i>                       | Alphaproteobacteria<br>Sphingomonadaceae  | 50      | none, constitutive<br><i>Sphingomonas</i><br>promoter                                        | no              | 10.2                                                        | brevunsin             | 4   |
| <i>Burkholderia / Mycetohabitans</i> | Betaproteobacteria<br>Burkholderiaceae    | 61      | <i>B. gladioli</i>                          | Gammaproteobacteria<br>Enterobacteriaceae | 50      | IPTG                                                                                         | no              | trace                                                       | burhizin-23           | 5   |
| <i>Burkholderia</i>                  | Betaproteobacteria<br>Burkholderiaceae    | 68      | <i>E. coli</i>                              | Gammaproteobacteria<br>Enterobacteriaceae | 50      | anhydrotetracycline<br>note: stem loop<br>between <i>capA</i> and<br><i>capB</i> removed     | no              | 1.6                                                         | capistruin            | 6   |
| <i>Burkholderia</i>                  | Betaproteobacteria<br>Burkholderiaceae    | 68      | <i>E. coli</i>                              | Gammaproteobacteria<br>Enterobacteriaceae | 50      | IPTG                                                                                         | no              | 0.2                                                         | capistruin            | 7   |
| <i>Burkholderia</i>                  | Betaproteobacteria<br>Burkholderiaceae    | 68      | <i>Burkholderia</i><br>Sp. FERM BP-<br>3421 | Betaproteobacteria<br>Burkholderiaceae    | 68      | L-arabinose                                                                                  | no              | Non-<br>outliers: 3<br>Outlier<br>over-<br>producer:<br>116 | capistruin            | 8   |
| <i>Caulobacter</i>                   | Alphaproteobacteria<br>Caulobacteraceae   | 68      | <i>E. coli</i>                              | Gammaproteobacteria<br>Enterobacteriaceae | 50      | IPTG                                                                                         | no              | 3.4                                                         | caulonodin I-<br>III  | 5   |
| <i>Caulobacter</i>                   | Alphaproteobacteria<br>Caulobacteraceae   | 68      | <i>E. coli</i>                              | Gammaproteobacteria<br>Enterobacteriaceae | 50      | IPTG                                                                                         | no              | 0.3                                                         | caulosegnin I-<br>III | 9   |
| <i>Citrobacter</i>                   | Gammaproteobacteria<br>Enterobacteriaceae | 52      | <i>E. coli</i>                              | Gammaproteobacteria<br>Enterobacteriaceae | 50      | IPTG for <i>citA</i> , and<br>constitutive<br>promoter of<br><i>mcjBCD</i> for <i>citBCD</i> | yes             | 2.7                                                         | citrocin              | 10  |
| <i>Klebsiella</i>                    | Gammaproteobacteria<br>Enterobacteriaceae | 57      | <i>E. coli</i>                              | Gammaproteobacteria<br>Enterobacteriaceae | 50      | L-arabinose                                                                                  | no              | 5                                                           | klebsidin             | 11  |
| <i>Sphingomonas</i>                  | Alphaproteobacteria<br>Sphingomonadaceae  | 65      | <i>S. subterranea</i>                       | Alphaproteobacteria<br>Sphingomonadaceae  | 63      | none, constitutive<br><i>Sphingomonas</i><br>promoter                                        | no              | 2.8                                                         | koreensin             | 12  |
| <i>Escherichia</i>                   | Gammaproteobacteria<br>Enterobacteriaceae | 50      | <i>E. coli</i>                              | Gammaproteobacteria<br>Enterobacteriaceae | 50      | ?                                                                                            | yes             | 12                                                          | microcin J25          | 13  |
| <i>Salmonella</i>                    | Gamaproteobacteria<br>Enterobacteriaceae  | 52      | <i>E. coli</i>                              | Gammaproteobacteria<br>Enterobacteriaceae | 50      | IPTG                                                                                         | no              | 9.61                                                        | microcin Y            | 14  |

|                          |                                             |    |                |                                           |    |             |     |       |                          |    |
|--------------------------|---------------------------------------------|----|----------------|-------------------------------------------|----|-------------|-----|-------|--------------------------|----|
| <i>Mycetohabitans</i>    | Betaproteobacteria<br>Burkholderiaceae      | 61 | <i>E. coli</i> | Gammaproteobacteria<br>Enterobacteriaceae | 50 | L-arabinose | no  | 1     | mycetohabin-15           | 15 |
| <i>Panderoaea</i>        | Betaproteobacteria<br>Burkholderiaceae      | 63 | <i>E. coli</i> | Gammaproteobacteria<br>Enterobacteriaceae | 50 | IPTG        | no  | 2     | pandonodin               | 16 |
| <i>Rhodanobacter</i>     | Gammaproteobacteria<br>Rhodanobacteraceae   | 65 | <i>E. coli</i> | Gammaproteobacteria<br>Enterobacteriaceae | 50 | IPTG        | no  | trace | rhodanodin               | 5  |
| <i>Rubrivivax</i>        | Betaproteobacteria<br>Burkholderiaceae      | 70 | <i>E. coli</i> | Gammaproteobacteria<br>Enterobacteriaceae | 50 | IPTG        | no  | 2.5   | rubrinodin               | 17 |
| <i>Rubrivivax</i>        | Betaproteobacteria<br>Burkholderiales order | 71 | <i>E. coli</i> | Gammaproteobacteria<br>Enterobacteriaceae | 50 | IPTG        | no  | 0.5   | rubrivinodin             | 5  |
| <i>Sphingobium</i>       | Alphaproteobacteria<br>Sphingomonadaceae    | 64 | <i>E. coli</i> | Gammaproteobacteria<br>Enterobacteriaceae | 50 | IPTG        | no  | 0.9   | sphingonodin<br>I and II | 5  |
| <i>Sphingopyxis</i>      | Alphaproteobacteria<br>Sphingomonadaceae    | 65 | <i>E. coli</i> | Gammaproteobacteria<br>Enterobacteriaceae | 50 | IPTG        | no  | 3.4   | sphingopyxin<br>I and II | 5  |
| <i>Sphingobium</i>       | Alphaproteobacteria<br>Sphingomonadaceae    | 64 | <i>E. coli</i> | Gammaproteobacteria<br>Enterobacteriaceae | 50 | IPTG        | no  | 5.2   | syandodin I              | 5  |
| <i>Burkholderia</i>      | Betaproteobacteria<br>Burkholderiaceae      | 68 | <i>E. coli</i> | Gammaproteobacteria<br>Enterobacteriaceae | 50 | IPTG        | yes | 1.8   | ubonodin                 | 18 |
| <i>Xanthomonas</i>       | Gammaproteobacteria<br>Xanthomonadaceae     | 65 | <i>E. coli</i> | Gammaproteobacteria<br>Enterobacteriaceae | 50 | IPTG        | no  | 12.7  | xanthomonin<br>I-III     | 19 |
| <i>Phenyllobacterium</i> | Alphaproteobacteria<br>Caulobacteraceae     | 70 | <i>E. coli</i> | Gammaproteobacteria<br>Enterobacteriaceae | 50 | IPTG        | no  | trace | zucinodin                | 5  |

Table updated from.<sup>8</sup>

Yields isolated from liquid cultures.

IPTG, isopropyl  $\beta$ -D-1-thiogalactopyranoside

Blue rows, isolated yields greater than 10 mg/L.

Trace, only trace amounts of compound detected.

**Table S2. Identified differences between the reference genome and either pSK020 outlier overproducer or pSK020+48 low producer. PATRIC was used for analysis.**

| Reference Genome                          | Variation found                                                                          | Type of mutation          | Amino Acid shift   | Frame-shift? | Function                                                              |
|-------------------------------------------|------------------------------------------------------------------------------------------|---------------------------|--------------------|--------------|-----------------------------------------------------------------------|
| <b>Outlier Overproducer</b>               |                                                                                          |                           |                    |              |                                                                       |
| CGC                                       | <u>CGCGCGGC</u>                                                                          | insertion                 | Arg2_Gly3fs        | yes          | Protein ImpG/VasA                                                     |
| GCCGA                                     | <u>GCCCGA</u>                                                                            | insertion                 | Ser500_Ala501fs    | yes          | T6SS component TssC (ImpC/VipB)                                       |
| CAAAAG                                    | <u>CCACTGCCCGA</u><br><u>AGGCCACGCGG</u><br><u>GACAAAAG</u>                              | insertion                 | –                  | –            | not in coding region                                                  |
| CGGT                                      | <u>GGGC</u>                                                                              | substitution (synonymous) | SerGly152SerGly    | no           | ABC transporter, substrate-binding protein                            |
| CCAC                                      | <u>CCACAC</u>                                                                            | insertion                 | Asp597_Val598fs    | yes          | hypothetical protein                                                  |
| ACCCTG                                    | <u>ACCCCTG</u>                                                                           | insertion                 | Arg835_Val836fs    | yes          | hypothetical protein                                                  |
| GCCCCACG                                  | <u>GCCCCCACG</u>                                                                         | insertion                 | Trp832_Gly833fs    | yes          | hypothetical protein                                                  |
| TCCCCGCCG<br>CA                           | <u>TCCCCGCCGC</u><br>A                                                                   | insertion                 | Ala827_Gly828fs    | yes          | hypothetical protein                                                  |
| CCTC                                      | <u>CCTCTC</u>                                                                            | insertion                 | Val808_Glu809fs    | yes          | hypothetical protein                                                  |
| GT                                        | <u>GCTC</u>                                                                              | insertion                 | Thr801fs           | yes          | hypothetical protein                                                  |
| CCG                                       | <u>CCAGCT</u>                                                                            | insertion                 | Ala691delinsGluLeu | no           | hypothetical protein                                                  |
| CGGGGCTTC<br>G                            | <u>CGGGGGGGGGC</u><br>TTCG                                                               | insertion                 | –                  | –            | not in coding region                                                  |
| CGGGGGC                                   | <u>CGGGGGGC</u>                                                                          | insertion                 | –                  | –            | not in coding region                                                  |
| ACA                                       | <u>ACCA</u>                                                                              | insertion                 | –                  | –            | not in coding region                                                  |
| G                                         | A                                                                                        | substitution (synonymous) | Leu150Leu          | no           | Quinolinate phosphoribosyltransferase [decarboxylating] (EC 2.4.2.19) |
| ATGCGA                                    | <u>ATCAAATGTGT</u><br><u>AGGTATAAGGC</u><br><u>GATGCGA</u>                               | insertion                 | Met1_Arg2fs        | yes          | Transcriptional regulator, HxIR family                                |
| GGTCG                                     | <u>CGTT</u>                                                                              | deletion                  | –                  | –            | not in coding region                                                  |
| CGACCGCGC<br>GCGCGA                       | <u>CGAGCTCGGTC</u><br>GG                                                                 | deletion                  | –                  | –            | not in coding region                                                  |
| CCCGACGAA<br>GCCTAGGCC<br>GCCCGCGGC<br>CC | <u>CCCGACGAAGC</u><br><u>CTAGGCCGCC</u><br><u>GCGCGGTATCG</u><br><u>AGCGGGCGGCC</u><br>C | insertion                 | –                  | –            | not in coding region                                                  |
| CCCCG                                     | <u>CCCCGCTCCCCG</u>                                                                      | insertion                 | Gly69_Gly70fs      | yes          | hypothetical protein                                                  |
| TCCCCG                                    | <u>TCCCCCGC</u>                                                                          | insertion                 | –                  | –            | not in coding region                                                  |
| ACCCG                                     | <u>ACCCCG</u>                                                                            | insertion                 | –                  | –            | not in coding region                                                  |
| CGCCCCGA                                  | <u>CCCGCCCCGA</u>                                                                        | insertion                 | Arg404delinsAlaGly |              | CaiB/BaiF family protein                                              |

|                                |                                                                                |                               |                            |               |                                                                   |
|--------------------------------|--------------------------------------------------------------------------------|-------------------------------|----------------------------|---------------|-------------------------------------------------------------------|
| GGC                            | <u>GGAGC</u>                                                                   | insertion                     | –                          | –             | LSU rRNA 23S rRNA, large subunit ribosomal RNA                    |
| CAACC                          | <u>CTTAACC</u>                                                                 | insertion                     | –                          | –             | LSU rRNA 23S rRNA, large subunit ribosomal RNA                    |
| CCT                            | <u>CCC</u>                                                                     | substitution (non-synonymous) | –                          | –             | not in coding region                                              |
| ACCGA                          | <u>ACCCGA</u>                                                                  | insertion                     | Ser156_Val157fs            | yes           | hypothetical protein                                              |
| <u>CCG</u> ACCGA               | CCCGA                                                                          | deletion                      | Arg148_Ser149del           |               | hypothetical protein                                              |
| A                              | T                                                                              | substitution                  | Gln270Leu                  | no            | Replicative DNA helicase (DnaB) (EC 3.6.4.12)                     |
| <b>Nonoutlier Low Producer</b> |                                                                                |                               |                            |               |                                                                   |
| CCGGGTGA                       | <u>CAATGTGATGC</u><br><u>GCCGGGTGA</u>                                         | insertion                     | –                          | –             | not in coding region                                              |
| GGC                            | <u>GGCAGC</u>                                                                  | insertion                     | Gln102_Pro103ins<br>GlnLeu | no            | hypothetical protein                                              |
| GGCGA                          | <u>GAGCTGA</u>                                                                 | insertion                     | Ala14fs                    | yes           | T6SS component TssK (ImpJ/VasE)                                   |
| A                              | G                                                                              | substitution (non-synonymous) | Ser16Gly                   | no            | T6SS component TssK (ImpJ/VasE)                                   |
| ACGCCTG                        | <u>ACGCCCCCTG</u>                                                              | insertion                     | Arg304_Arg305ins<br>ArgGly | no            | T6SS component TssM (IcmF/VasK)                                   |
| TACG                           | <u>TACACG</u>                                                                  | insertion                     | not indicated              | not indicated | SSU rRNA 16S rRNA, small subunit ribosomal RNA                    |
| TCG                            | <u>GTA</u>                                                                     | substitution (non-synonymous) | AlaArg60ValArg             | no            | T6SS component TssM (IcmF/VasK)                                   |
| CCGCCG                         | <u>CCTGCGCGCGC</u><br>G                                                        | insertion                     | Gly292delinsAlaArgAla      | no            | T6SS outer membrane component TssL (ImpK/VasF) / OmpA/MotB domain |
| G                              | C                                                                              | substitution (synonymous)     | Ala2228Ala                 | no            | hypothetical protein                                              |
| T                              | C                                                                              | substitution (synonymous)     | Thr237Thr                  | no            | VgrG protein                                                      |
| T                              | C                                                                              | substitution (non-synonymous) | Leu252Pro                  | no            | VgrG protein                                                      |
| A                              | G                                                                              | substitution (synonymous)     | Lys256Lys                  | no            | VgrG protein                                                      |
| T                              | C                                                                              | substitution (non-synonymous) | Val311Ala                  | no            | VgrG protein                                                      |
| T                              | C                                                                              | substitution (synonymous)     | Tyr14Tyr                   | no            | VgrG protein                                                      |
| AAGCCTAGG<br>CCGCCCGCG<br>GCC  | <u>AAGCCTAGGCC</u><br><u>GCCCCGCGCGGT</u><br><u>ATCGAGCGGGC</u><br><u>GGCC</u> | insertion                     | –                          | –             | hypothetical protein                                              |

|           |                     |                                      |                   |                      |                                                           |
|-----------|---------------------|--------------------------------------|-------------------|----------------------|-----------------------------------------------------------|
| G         | A                   | substitution<br>(synonymous)         | Val320Val         | no                   | NADH-ubiquinone<br>oxidoreductase chain<br>N (EC 1.6.5.3) |
| CCCCGGA   | <u>T</u> CCCCGGA    | substitution<br>(non-<br>synonymous) | Gly70Ser          | no                   | hypothetical protein                                      |
| CGCCCCAG  | CGCCCC <u>C</u> AG  | insertion                            | –                 | –                    | not in coding region                                      |
| GCACCCGCA | GCACCCC <u>G</u> CA | insertion                            | –                 | –                    | not in coding region                                      |
| GCCCCGCC  | GCCCC <u>C</u> GCC  | insertion                            | –                 | –                    | not in coding region                                      |
| AGGGA     | AGGG <u>G</u> A     | insertion                            | not indicated     | not<br>indicate<br>d | LSU rRNA 23S<br>rRNA, large subunit<br>ribosomal RNA      |
| A         | C                   | substitution<br>(synonymous)         | Arg94Arg          | no                   | hypothetical protein                                      |
| CC        | <u>AT</u>           | substitution<br>(non-<br>synonymous) | GlnAla15582GlnSer | no                   | Polyketide synthase<br>modules and related<br>proteins    |



**Table S3. Primer sequence list for plasmid construction requiring PCR.**

| Plasmid constructed                | Forward primer                                                                                                                                                                        | Reverse primer                                                                                                                          |
|------------------------------------|---------------------------------------------------------------------------------------------------------------------------------------------------------------------------------------|-----------------------------------------------------------------------------------------------------------------------------------------|
| <b>pKAE001</b>                     | P_CapBGC_BgIII_f<br>GCC TAA <u>AGA TCT CCT</u> GCA<br>TCG ATT TAT TAT GAC<br><i>BgIII</i> site underlined                                                                             | P_CapBGC_NdeI_r<br>GAC TAA <u>CAT ATG CAC</u> ACA<br>GGA AAC AGC TAT G<br><i>NdeI</i> site underlined                                   |
| <b>pHNF008</b>                     | PBAD_NheI_f<br>CGT AAC <u>GCT AGC CCT</u> GCA<br>TCG ATT TAT TAT GAC<br><i>NheI</i> site underlined                                                                                   | PBAD_BgIII_r<br>GAT <u>AGA TCT ACT</u> CGA GGC<br>TAT GAC ATG ATT ACG AAT TC<br><i>BgIII</i> site underlined                            |
| <b>pHNF009</b>                     | P_pBBR1_G159S_f<br>ACT ACC GAC CAG CCC CGG<br>CGA                                                                                                                                     | P_pBBR1_G159S_r<br>TGC TGC TCG CCC GGA TAC                                                                                              |
| <b>pAK343</b>                      | P_mlsA1A2B_OLEwithpUC_f<br><u>TAG AGG ATC CCC GGG TAC</u><br><u>CGA GCT</u> <i>atcaaggagatttc</i> ATG<br>AAT AAG CAG CAA GAC GTG<br>Overlap region underlined, RBS<br>site in italics | P_mlsA1A2B_OLEwithmlsC_r<br><u>ATA GGC GAT GCC GAG CAG</u><br><u>GGT CAT</u> TCA CAG GGG CAG<br>TGC C<br>Overlap region underlined      |
|                                    | P_mlsC_OLEwithmlsAB_f<br><u>CCG CTG CTG GCA CTG CCC</u><br><u>CTG TGA</u> ATG ACC CTG CTC<br>GGC ATC<br>Overlap region underlined                                                     | P_mlsC_OLEwithpUC_r<br><u>GCT ATG ACC ATG ATT ACG</u><br><u>AAT TCG TCA TTG CCA TCC TTG</u><br>AAC AAA CAG<br>Overlap region underlined |
| <b>pAK343</b><br>Sanger sequencing | CGT CAC ACT TTG CTA TGC<br>CA                                                                                                                                                         | N/A                                                                                                                                     |
| <b>pHNF007</b>                     | P_B13BGC_BgIII_f<br>GAC TAA <u>AGA TCT CCT</u> GCA<br>TCG ATT TAT TAT GAC<br><i>BgIII</i> site underlined                                                                             | P_B13BGC_HindIII_r<br>GAC TAG <u>AAG CTT GCT</u> ATG<br>ACA TGA TTA CGA ATT C<br><i>HindIII</i> site underlined                         |
| <b>pHNF012</b>                     | P_pBBR1_G159S_f<br>ACT ACC GAC CAG CCC CGG<br>CGA                                                                                                                                     | P_pBBR1_G159S_r<br>TGC TGC TCG CCC GGA TAC                                                                                              |
| <b>araC qPCR</b>                   | P_araC_qPCR_f<br>TAA CCT TTC ATT CCC AGC<br>GGT C                                                                                                                                     | P_araC_qPCR_r<br>CTG CCG GGA TAC TCG TTT AAT<br>G                                                                                       |

|                                    |                                                |                                                      |
|------------------------------------|------------------------------------------------|------------------------------------------------------|
| <b><i>kan<sup>R</sup></i> qPCR</b> | P2_kanqPCR_f<br>CTC TGG TAA GGT TGG GAA<br>GC  | P2_kanqPCR_r<br>GTG CAA TCC ATC TTG TTC AAT<br>CAT G |
| <b><i>recA</i> qPCR</b>            | P_recA_qPCR_f<br>ACA CCA CCT GGA TGT CCT<br>CG | P_recA_qPCR_r<br>ATG GAA GAT AGC AAG AAG<br>GGT TC   |
| <b><i>gyrA</i> qPCR</b>            | P_gyrA_qPCR_f<br>ACA CCG AAG ACC TGA TCA<br>CG | P_gyrA_qPCR_r<br>TCC AGT CGT CTT CCT TCA TCT<br>G    |

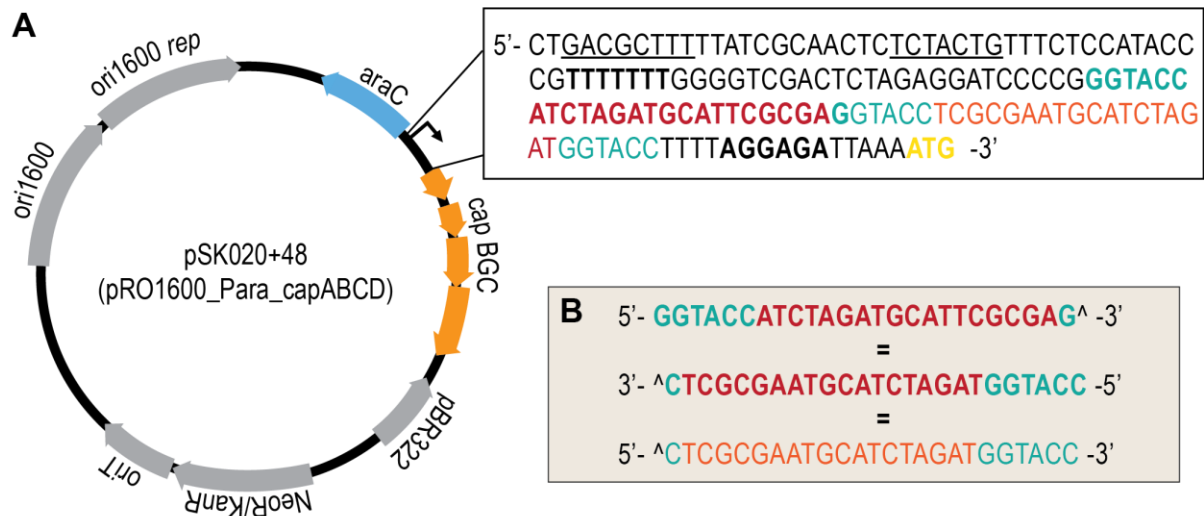

**Figure S1. Schematic of pSK020+48 plasmid and sequence of the promoter region.** (A) The capistrain BGC (*capABCD*, orange) under the control of the *araC* regulator (blue) and  $P_{BAD}$  promoter in the pR01600-based vector. The sequence of the  $P_{BAD}$  promoter is denoted by underlined -35 and -10 regions, respectively. The 48-bp insertion (dark and light red) is located upstream of the start codon of *capA* (yellow) and contains three *KpnI* sites (teal). The thymine-rich region that is part of the translation enhancer and the RBS site upstream of *capA* are bolded. (B) We speculate the 48-bp insertion originated from the pUC57-Kan vector used to clone the synthetic *cap* BGC, which was used to generate pSK020. The 48-bp insertion (dark and light red) is composed of inverted repeats flanked by *KpnI* sites (teal).

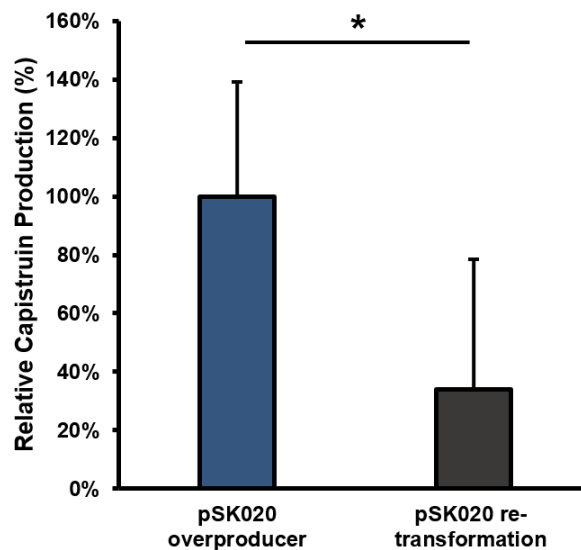

**Figure S2. Plasmid is not the only factor contributing to the overproducer phenotype.** Comparison of capistrain titers between pSK020 overproducer and clones that were obtained after retransformation of the plasmid isolated from the overproducer host into the *Burkholderia* sp. WT strain. Average of  $N = 4 \pm$  standard deviation. For the overproducer clone,  $N = 3$  indicates results from three production culture flasks inoculated from the same seed culture. For the cleared host,  $N = 4$  indicates results from three independent clones. The plasmid from the pSK020 overproducer was reintroduced via electroporation and four independent clones were selected for analysis. T-test was implemented for statistical analysis. \*,  $P = 0.09$ .

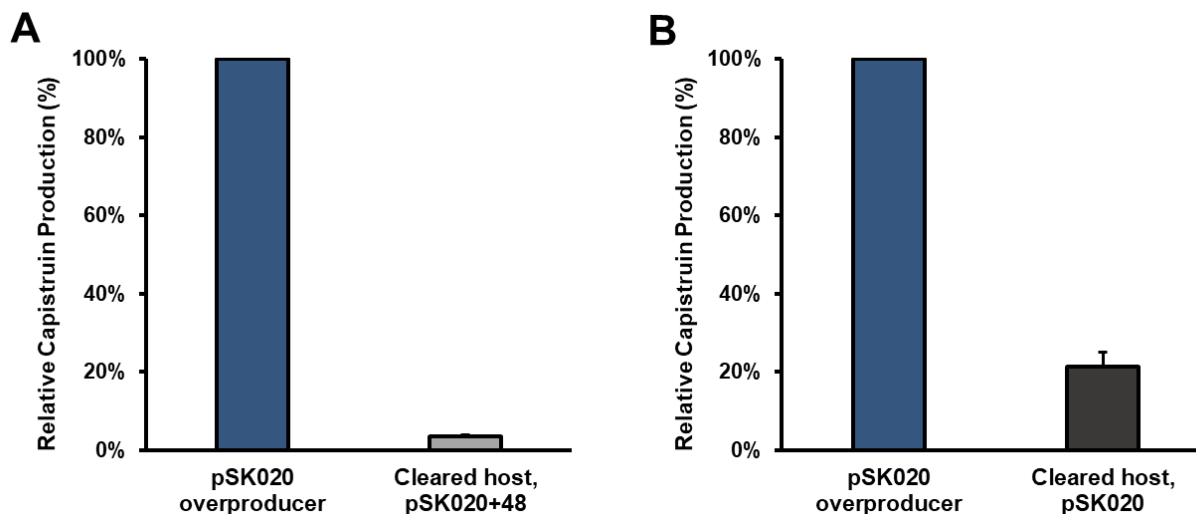

**Figure S3. Assessment of the overproducer clone's ability to recapitulate high yield capistrain production when used as a heterologous host.** Comparison of capistrain titers between pSK020 overproducer and clones that were obtained after clearing the pSK020 overproducer clone of plasmid and retransforming it. (A) After host clearing, pSK020+48 plasmid from *E. coli* was reintroduced into the host via electroporation.  $N = 1$  for pSK020 overproducer and average of  $N = 7 \pm$  standard deviation of 0.5% is shown for cleared host, pSK020+48. Biological replicates were utilized. (B) After plasmid clearing, the pSK020 plasmid from the overproducer was retransformed into the cleared host.  $N = 1$  for pSK020 overproducer and average of  $N = 2 \pm$  standard deviation of 3.5% is shown for cleared host, pSK020. Biological replicates were utilized.

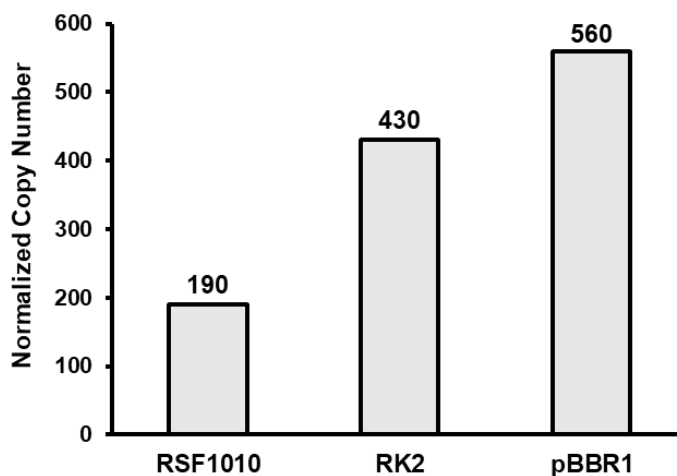

**Figure S4. Normalized copy number of different replicons in *Burkholderia sp. FERM BP-3421*.** Empty vectors containing the RSF1010 (pAM4891), RK2 (pSEVA227M), and pBBR1 (pMo168) replicons were transferred into *Burkholderia sp.* and genomic DNA was then isolated and sequenced using Illumina technology. Normalized plasmid copy number per genome equivalent is shown. All vectors contain a kanamycin resistance marker.

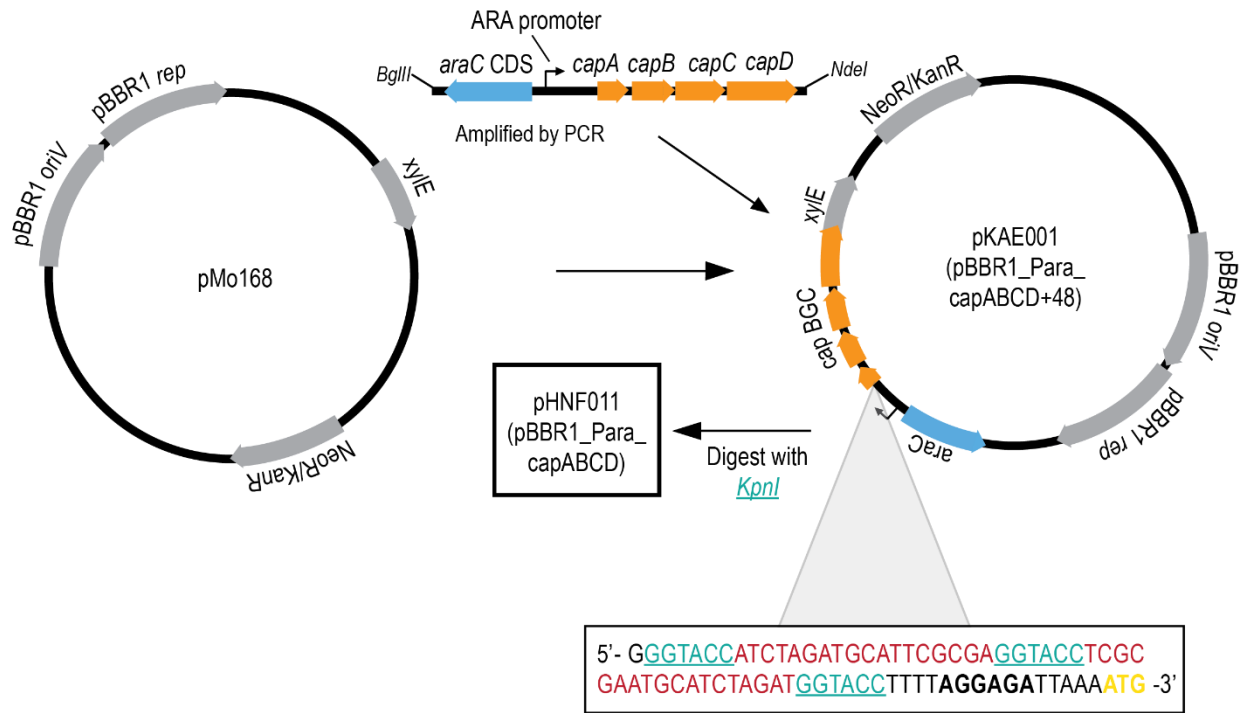

**Figure S5. Generation of pKAE001 and pHNF011.** The *cap* BGC (orange) under the control of the *araC*/ $P_{BAD}$  promoter was amplified by PCR and subcloned into pMo168 (pBBR1-based vector) using the restriction sites *Bgl*III and *Nde*I to generate pKAE001. Cloning of the *cap* BGC disrupted the *xylE* reporter gene. The 48 bp insert (red) between the  $P_{BAD}$  promoter and the RBS is present in pKAE001 because pSK020+48 was used as PCR template before we discovered the 48-bp insertion. The underlined sites in teal bordering and within the 48-bp insert denote *Kpn*I restriction sites. Isolated pKAE001 plasmid was digested with *Kpn*I and ligated to generate pHNF011. In the boxed sequence, the RBS site is bolded, and the start of transcription is shown in yellow.

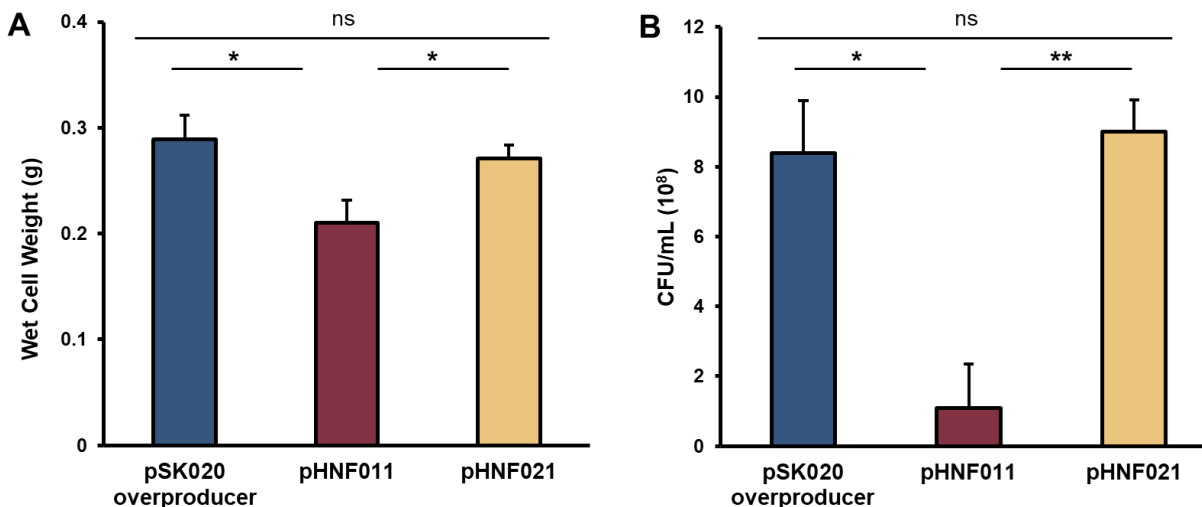

**Figure S6. Comparison of cell density between production cultures of *Burkholderia* sp. FERM BP-3421 harboring alternate capistrain expression vectors.** (A) The wet cell weight of production cultures of FERM BP-3421 harboring the pSK020, pHNF011, or pHNF021 vectors. Wet cell weights were acquired from aliquots (10 mL) of 48-h production cultures, which were centrifuged at maximum speed to separate the supernatant and cell mass. The average of  $N = 3 \pm$  standard deviation is shown. (B) The number of colony forming units per milliliter (CFU/mL) from production cultures of FERM BP-3421 harboring the pSK020, pHNF011, or pHNF021 vectors. CFU/mL counts were acquired from serially diluting resuspended cell pellet that was harvested from 10 mL aliquots of 48-h production cultures. The average of  $N = 3 \pm$  standard deviation is shown. T-test was implemented for statistical analysis. \*,  $P \leq 0.02$ ; \*\*,  $P \leq 1.0E^{-4}$ ; ns, no significant difference.

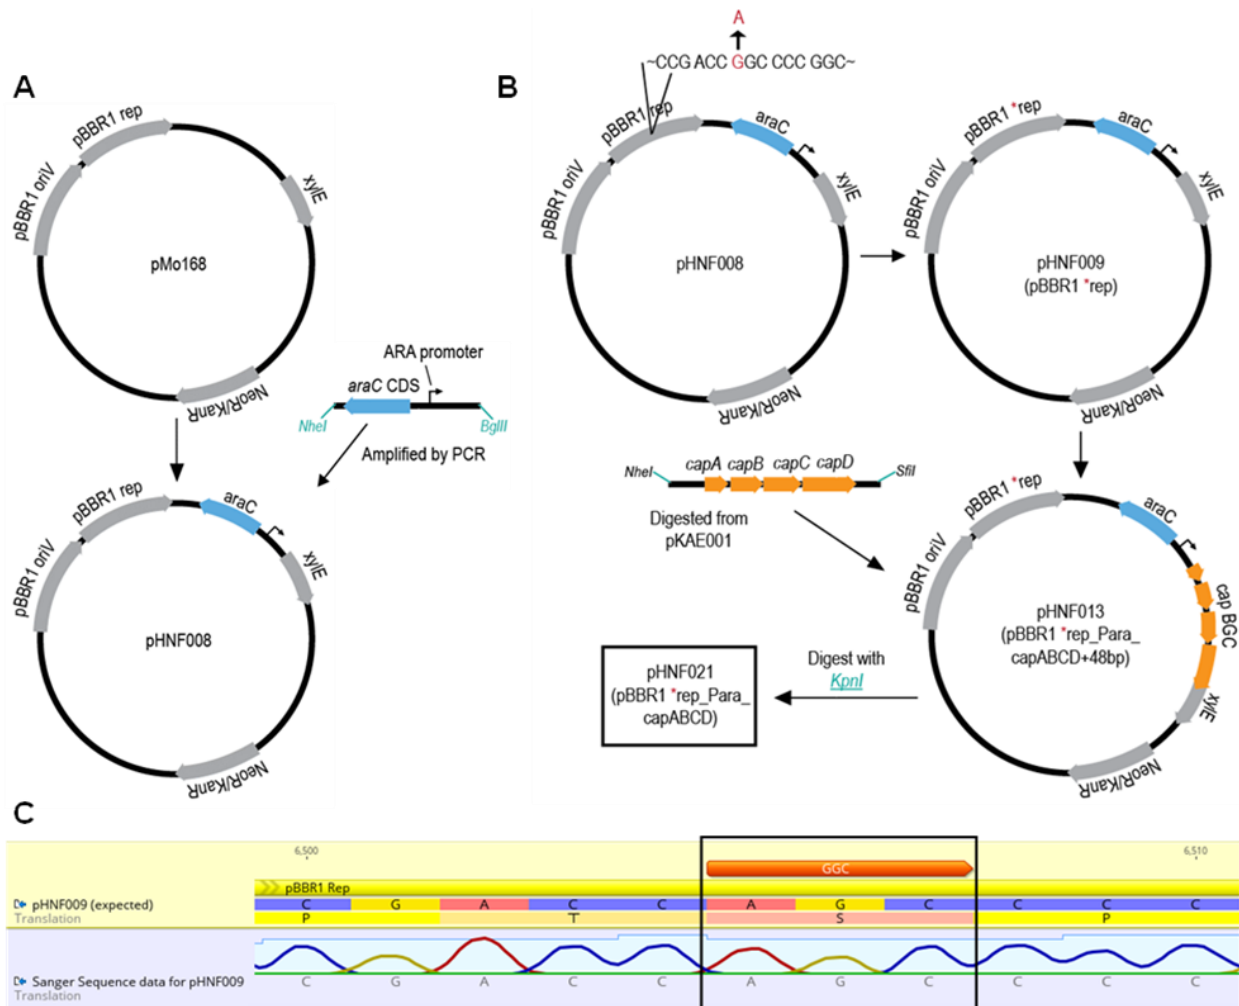

**Figure S7. Generation of pHNF021.** (A) The *araC*/ $P_{BAD}$  L-arabinose inducible promoter was cloned into the pMo168 vector backbone to generate pHNF008. (B) Site-directed mutagenesis was used to introduce the G159S point mutation in the pBBR1 *rep* gene and generate pHNF009 (indicated as pBBR1 \**rep*). pHNF013 was constructed by subcloning the capistruin BGC into pHNF009 using the restrictions sites *NheI* and *SfiI*. pHNF013 contained the 48 bp insert carried over from the template plasmid before we found out about the 48-bp insertion. pHNF021 was then created by further digesting pHNF013 with *KpnI* (teal) and ligating the digested plasmid. Cloning of the *cap* BGC disrupted the *xylE* reporter gene. All constructs were verified by restriction digest and either Sanger or whole plasmid sequencing. (C) Sanger sequence data indicating the introduction of the point mutation in the *rep* gene. The orange arrow annotation indicates the original sequence of the *rep* codon (GGC) before introduction of the point mutation (AGC).

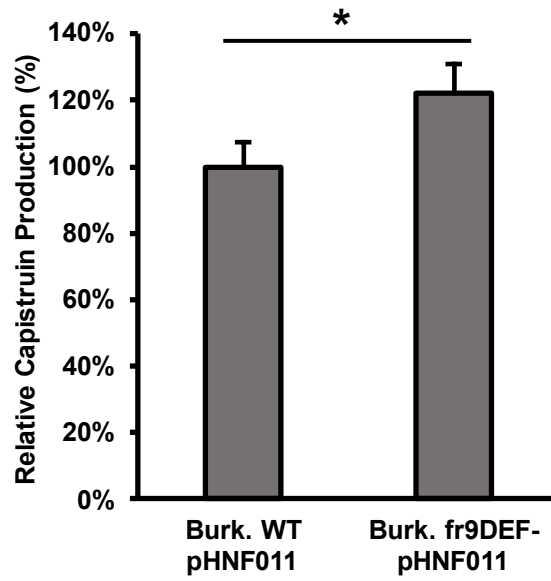

**Figure S8. Production of capistrain in wild-type and spliceostatin-defective mutant of *Burkholderia* sp. FERM BP-3421.** Relative capistrain titers when using the WT background versus the *fr9DEF* background. The average of triplicates  $\pm$  standard deviation is shown for both WT and mutant. T-test was implemented for statistical analysis. \*,  $P = 0.03$ .



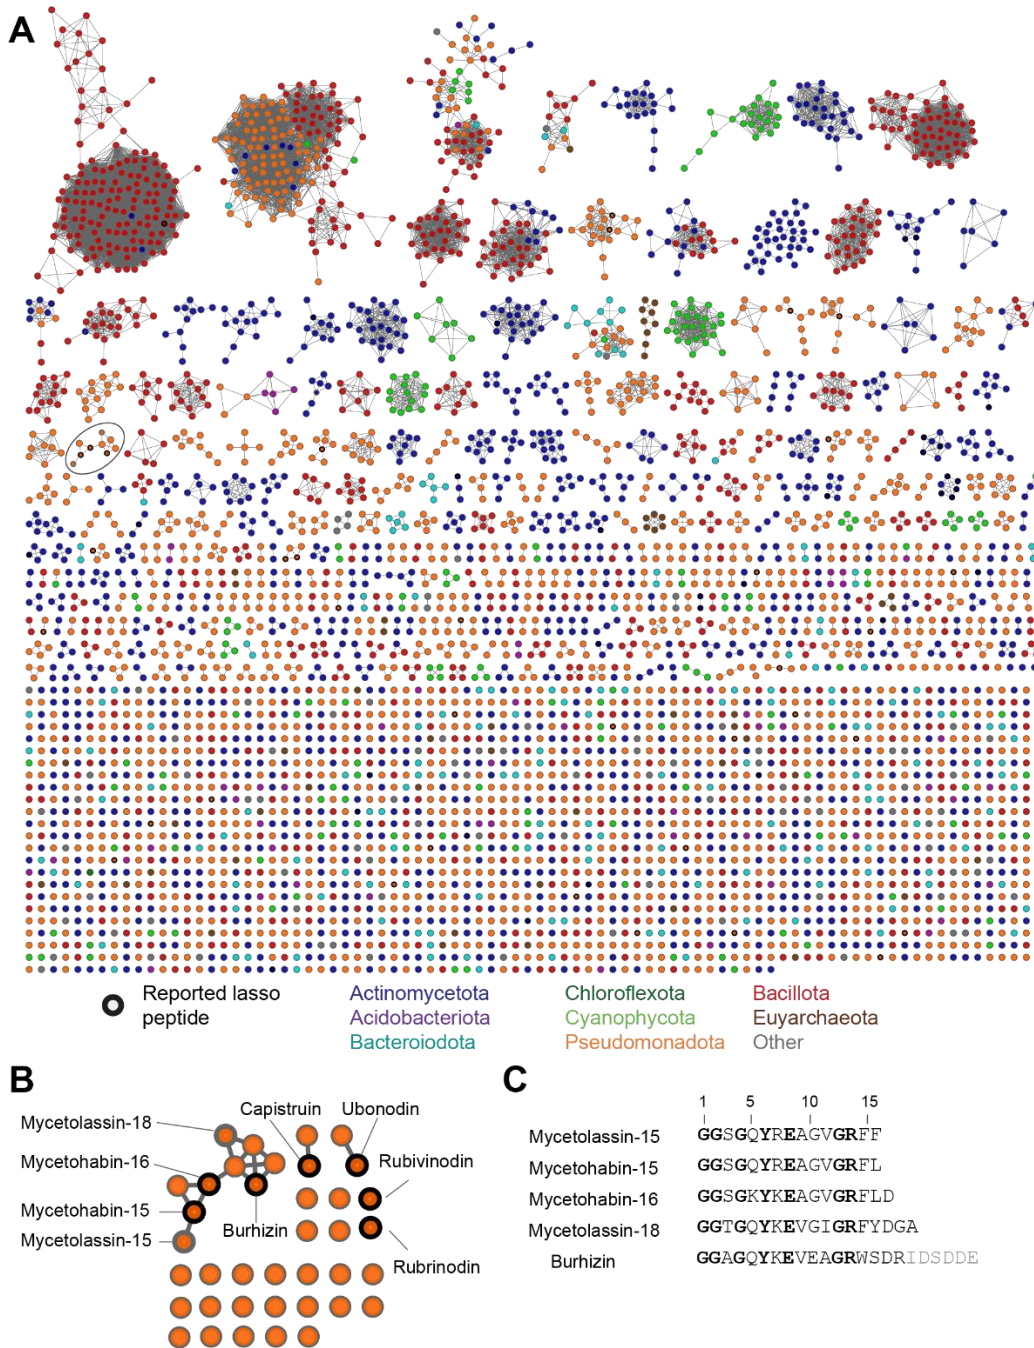

**Figure S9. Sequence similarity networks of predicted lasso core peptides.** Core peptides from a previous curation of predicted lasso peptides.<sup>20</sup> The non-identical set of curated sequences ( $N = 4,485$ ) was used to generate a sequence similarity network (SSN) using EFI-EST.<sup>21</sup> **(A)** SSN at alignment score 5 is displayed and colored by phylum of the encoding organism. Bolded nodes are core sequences from experimentally validated lasso peptides. The clade containing mycetolassin-15 and -18 is circled. **(B)** SSN at alignment score 5 of core peptides from *Burkholderiaceae* only. Literature reported lasso peptides are indicated. **(C)** A comparison of the sequences of several reported lasso peptides and mycetolassin-15 and -18. Conserved residues are in bold. Residues not observed in the final lasso product are grey.

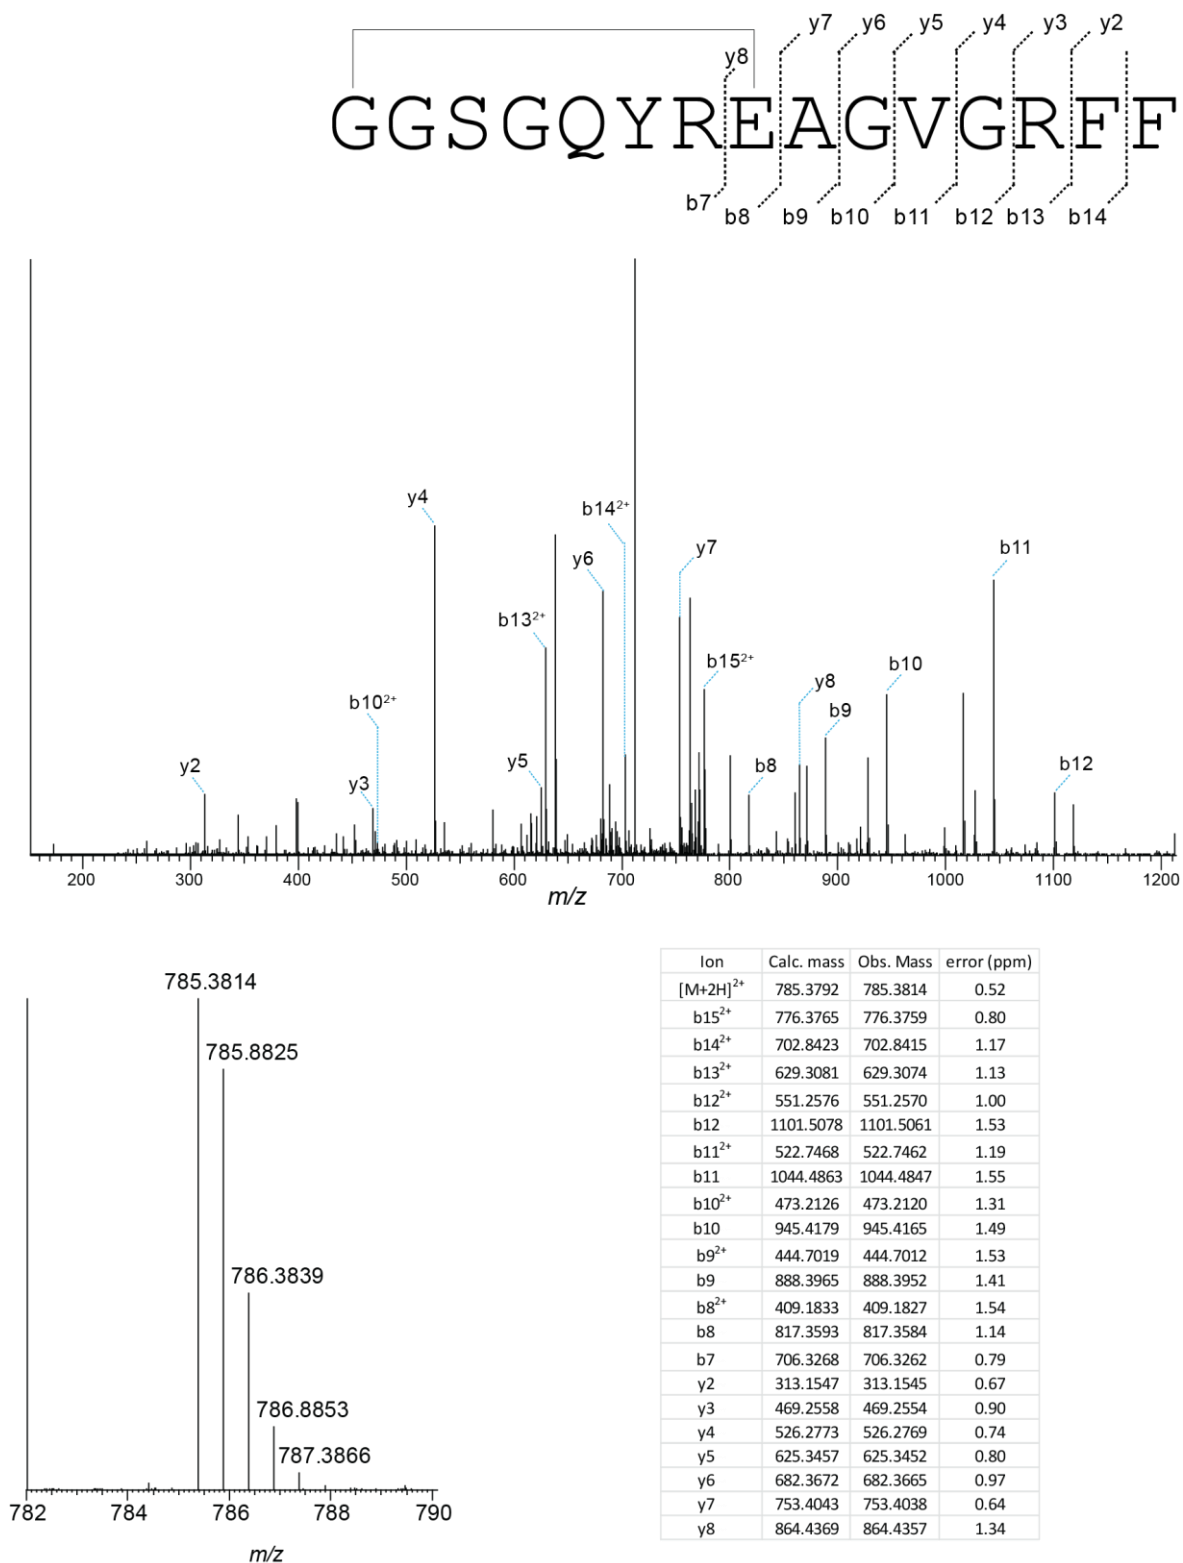

**Figure S10. HR-ESI-MS/MS of purified mycetolassin-15.** Mycetolassin-15 was subjected to collision induced dissociation (30 keV), resulting in a series of b<sup>+</sup>, b<sup>2+</sup>, and y<sup>+</sup> ions consistent with a macrolactam linkage between Gly1 and Glu8 of the mycetolassin-15 core peptide. HR-MS of purified mycetolassin-15 is consistent with the predicted mass of the core peptide with a single cyclization.

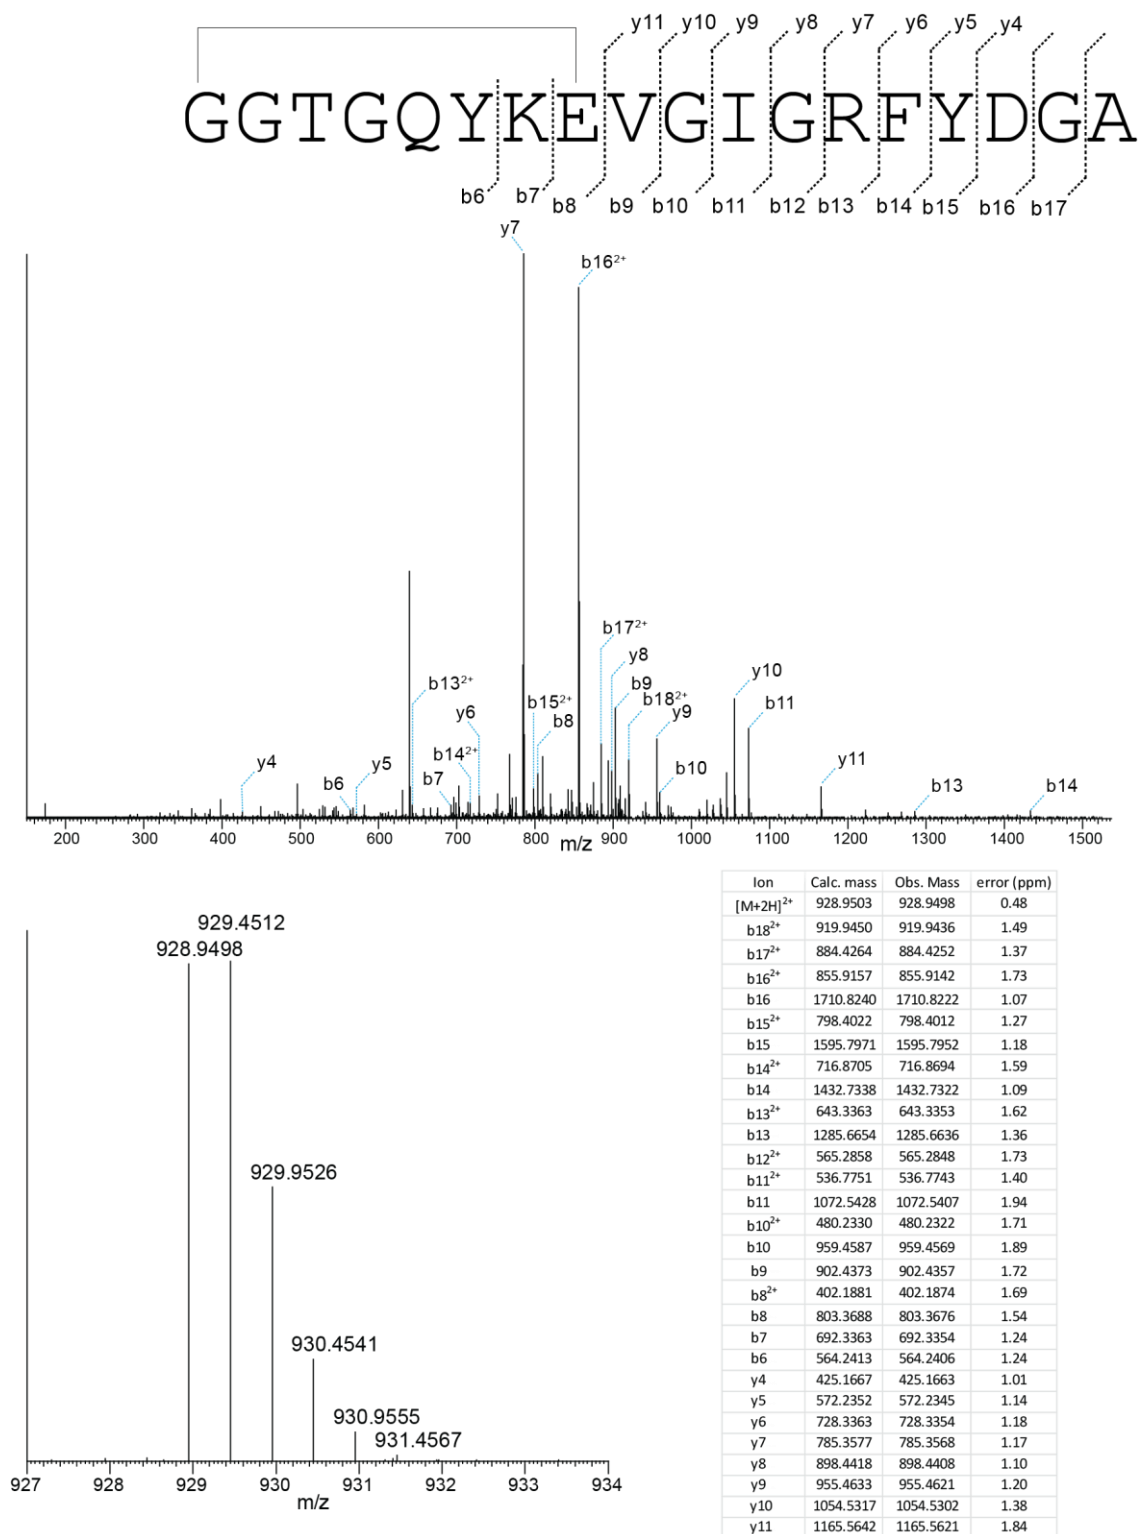

**Figure S11. HR-ESI-MS/MS of purified mycetolassin-18.** Mycetolassin-18 was subjected to collision induced dissociation (30 keV), resulting in a series of b<sup>+</sup>, b<sup>2+</sup>, and y<sup>+</sup> ions. The significantly lower intensity of the b7, b6, b5, and y12 ions is consistent with a macrolactam linkage between Gly1 and Glu8 of the mycetolassin-18 core peptide. HR-MS of purified mycetolassin-18 is consistent with the predicted mass of the core peptide with a single cyclization.

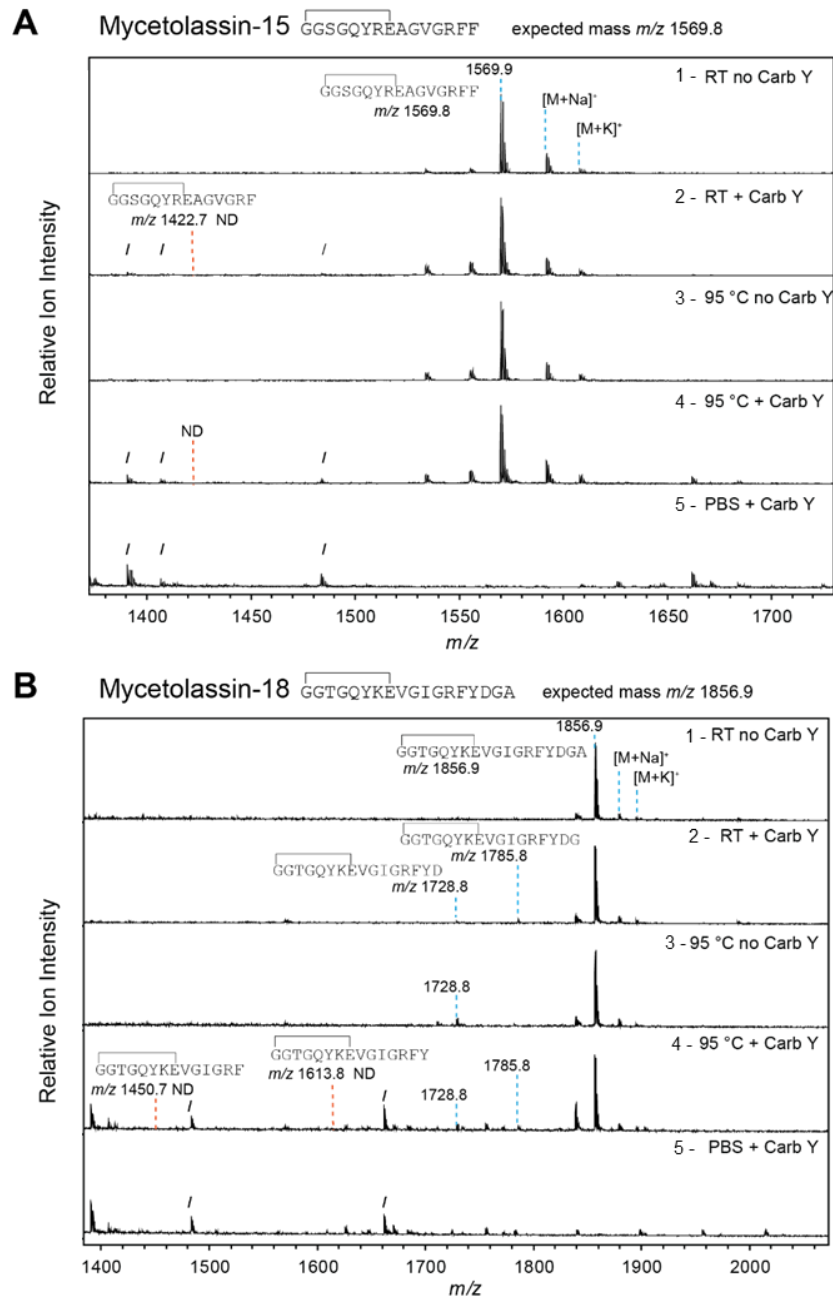

**Figure S12. Proteolytic resistance of purified mycetolassins.** Panel 1 and 2, purified (A) mycetolassin-15 and (B) mycetolassin-18 treated with either PBS control or carboxypeptidase Y and incubated for 18 h at room temperature. Panel 3 and 4, mycetolassins subjected to initial heat treatment for 3h at 95 °C followed by carboxypeptidase treatment identical to above. (A) After either treatment of mycetolassin-15, removal of the C-terminal residue F15 ( $m/z$  1422.7) was not detected (ND, orange). (B) Carboxypeptidase treatment of mycetolassin-18 with/without heat exposure yielded masses corresponding to the removal of the C-terminal Ala ( $m/z$  1785.8) and Gly-Ala ( $m/z$  1728.8), shown in panel 2 and 4 in blue. Heat treatment of mycetolassin-18 alone yielded a mass corresponding to the removal of the two C-terminal residues G17A18 ( $m/z$  1728.8), indicated in panel 3 in blue. Removal of three or four residues was not observed (ND, orange). Masses indicated with / were identified in the PBS, carboxypeptidase Y sample and were not attributed to the mycetolassins, panel 5.

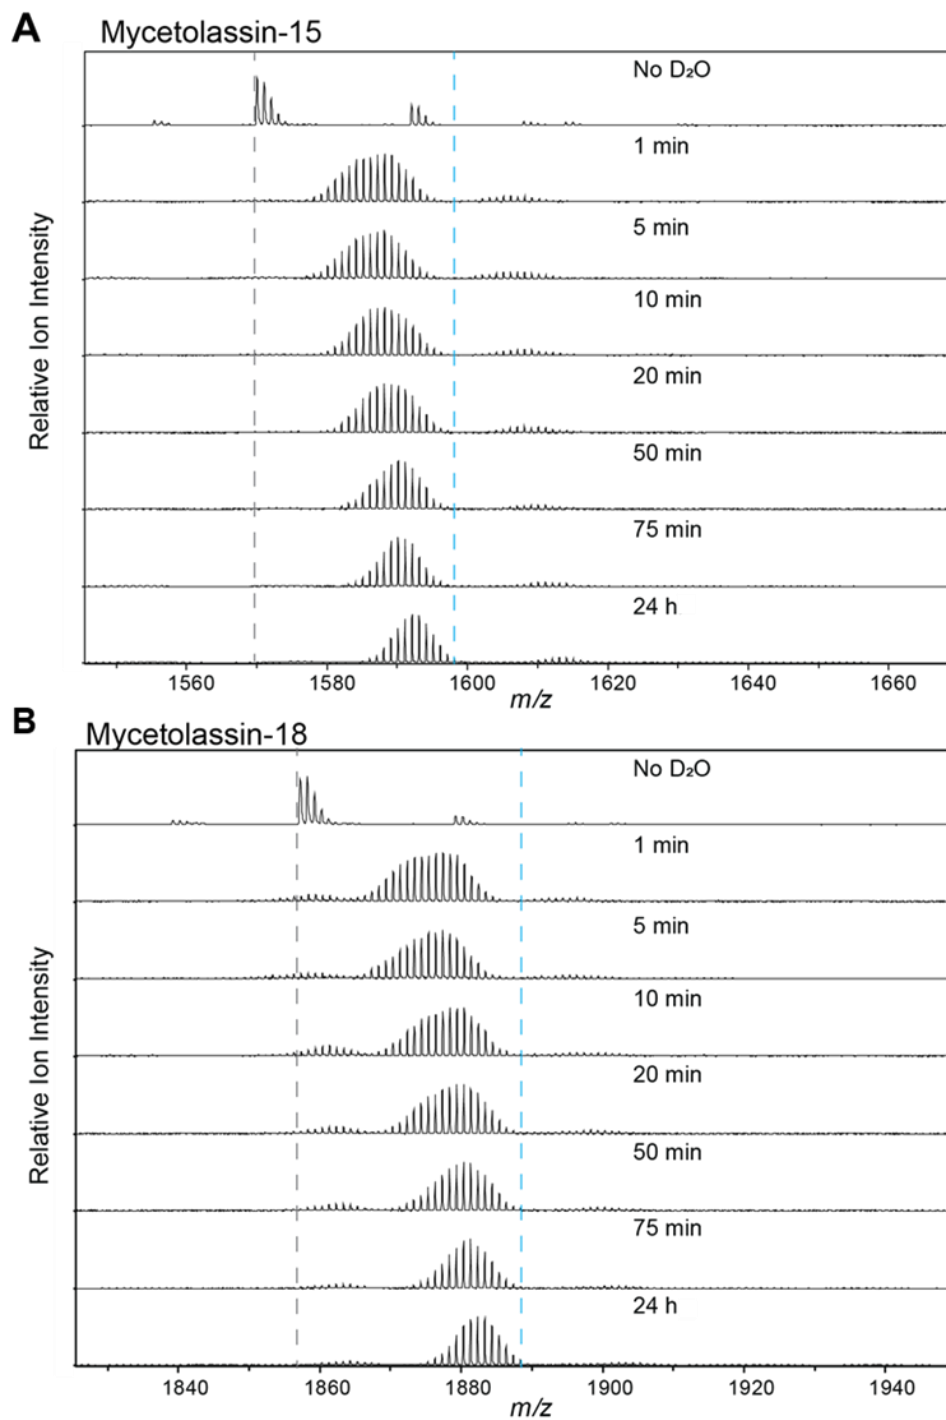

**Figure S13. Hydrogen-deuterium exchange of mycetolassin-15 and mycetolassin-18.** Raw data for mycetolassin-15 (**A**) and mycetolassin-18 (**B**) peptide deuteration over time. Partial deuteration occurred rapidly, but deuteration continued to progress for 24 h, which supports a threaded conformation. The expected mass of mycetolassin-15 and -18 is  $[M+H]^+ m/z = 1569.9$  and  $1856.9$ , respectively (shown in grey, dashed lines). With full deuteration the expected mass is  $[M+H]^+ m/z = 1598$  and  $1888$  for mycetolassin-15 and mycetolassin-18, respectively (shown in blue, dashed line), approximated using MSTools.<sup>22</sup>

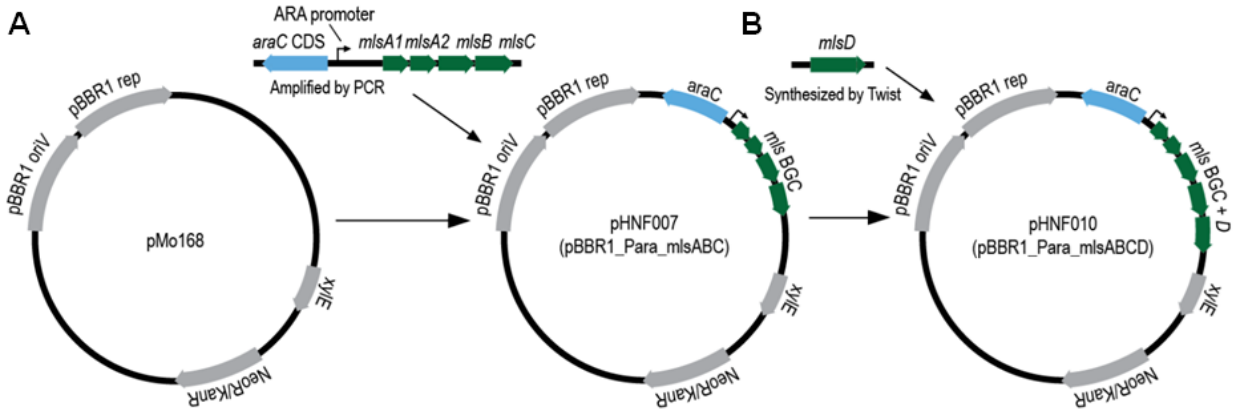

**Figure S14. Generation of pHNF007 and pHNF010.** (A) The mycetolassin BGC (*mlsA<sub>1</sub>A<sub>2</sub>BC* green) under the control of the *araC*/P<sub>BAD</sub> promoter was amplified by PCR and subcloned into pMo168 (pBBR1-based vector) to generate pHNF007. (B) The native *mlsD* transporter gene was synthesized by Twist and *HindIII* and *SphI* restriction sites were used to subclone *mlsD* into pHNF007 to generate pHNF010.

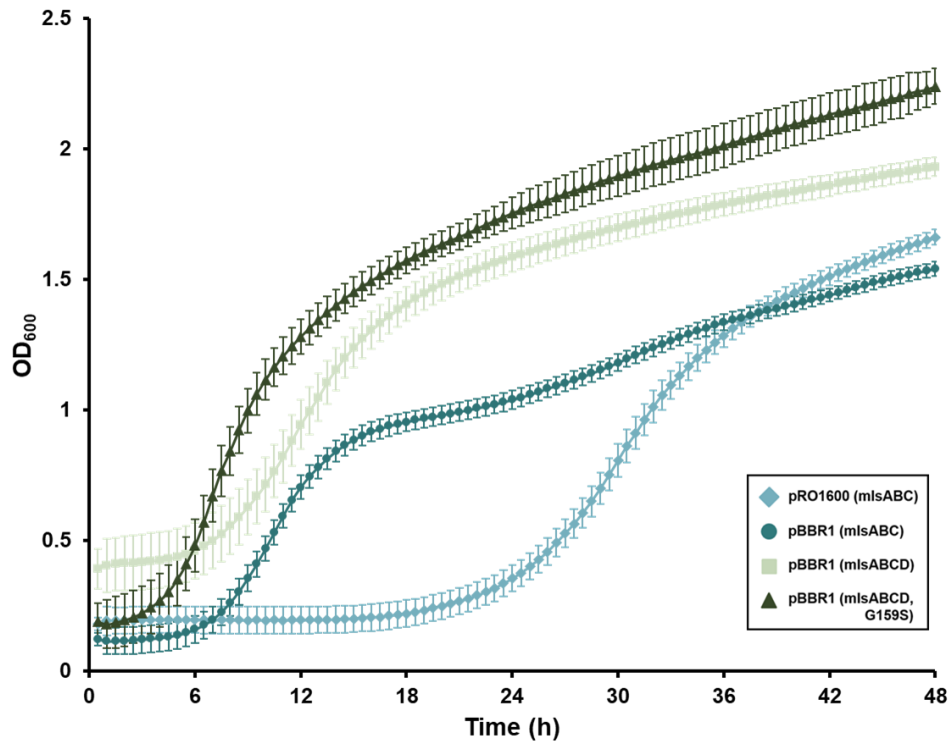

**Figure S15. Growth curve comparison between production with alternate *mls* expression vectors.** Forty-eight-hour growth comparison in production media between the *Burkholderia* sp. FERM BP-4321 spliceostatin-defective mutant strain (*fr9DEF*<sup>-</sup>) containing alternate *mls* expression vectors. The average of  $N = 10 \pm$  standard deviation is shown.

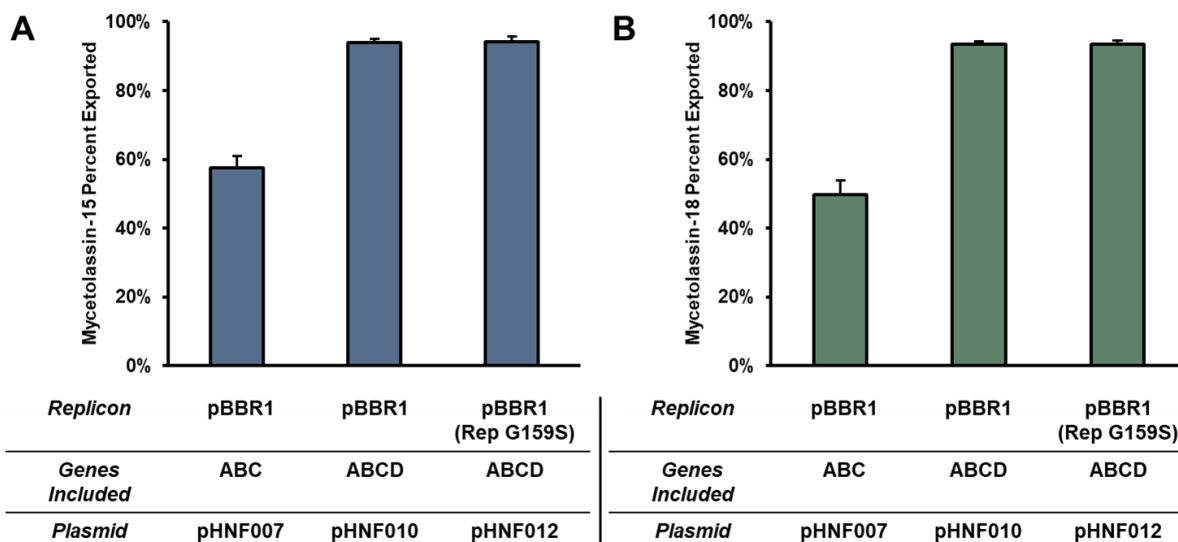

**Figure S16. Export of mycetolassins with and without inclusion of transporter gene.** (A) The percent of mycetolassin-15 detected in the supernatant of production cultures. (B) The percent of mycetolassin-18 detected in the supernatant of production cultures. Production was done in the *Burkholderia* sp. *fr9DEF*<sup>-</sup> strain. The average of triplicates  $\pm$  standard deviation is shown.



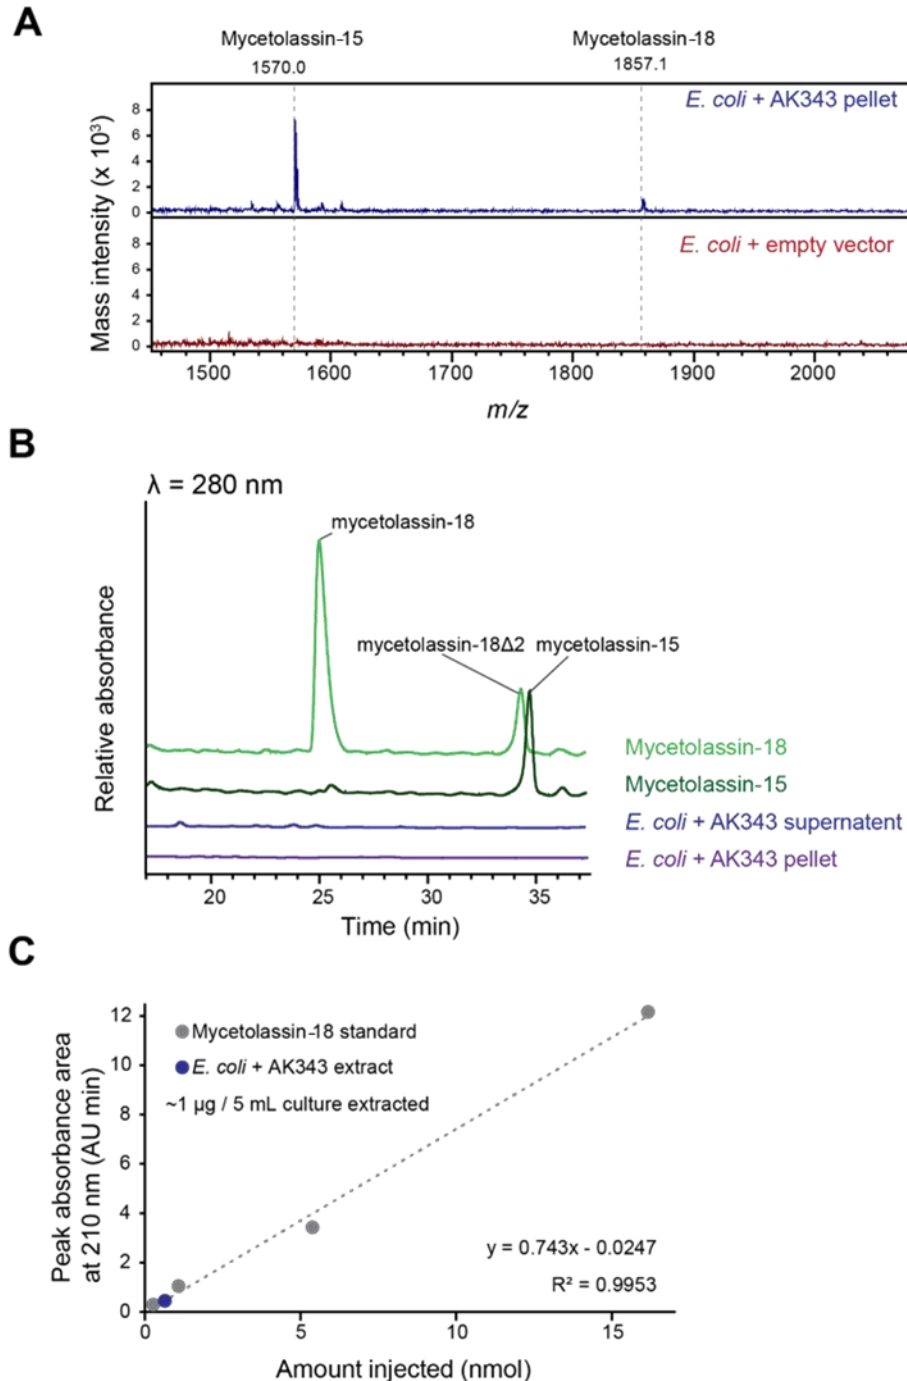

**Figure S17. Production of mycetolassins in *E. coli*.** (A) Masses corresponding to mycetolassin-15 and mycetolassin-18 (expected mass  $[M+H]^+$   $m/z = 1569.9$  and  $1856.9$ , respectively) were observed in trace amounts by MALDI-TOF-MS in *E. coli* expressing pAK343 (containing *mslA1A2BC*) and not in the empty vector control. (B) HPLC traces of the pellet and supernatant extracts from *E. coli* do not show significant peaks at 280 nm at the retention times consistent with purified mycetolassin-15 and mycetolassin-18. (C) Quantification of mycetolassin-18 from a 500 mL *E. coli* culture expressing pAK343. 1% of the extract (eq.  $\sim 5$  mL culture) was injected onto the HPLC and the area of the 210 nm absorbance peak corresponding to retention time of mycetolassin-18 was compared to a standard curve to determine yield ( $N = 1$ ). Blue circle, *E. coli* extract; grey circles, authentic standard.



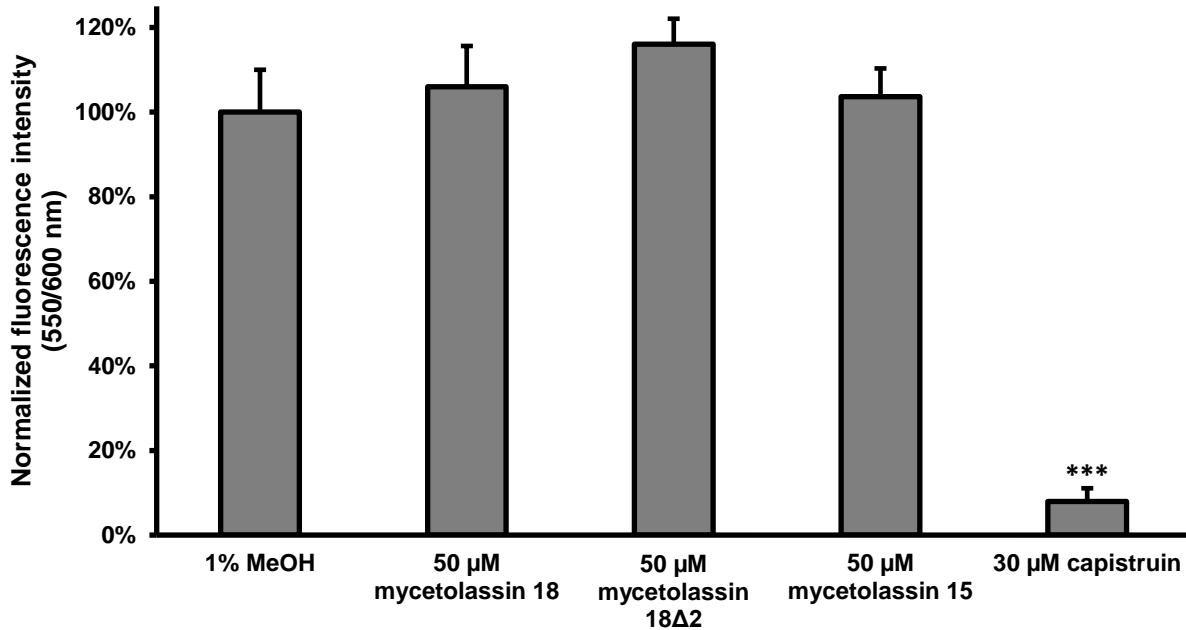

**Figure S18. Inhibition of transcription and/or translation assessed by cell free production of mCherry.** mCherry under the control of an endogenous *E. coli*  $\sigma 70$  promoter was produced in the presence of negative control 10% methanol, and 50  $\mu\text{M}$  final concentration of mycetolassin-15, a C-terminal truncation of mycetolassin-18 (mycetolassin-18 $\Delta 2$ ), and mycetolassin-18. Capistrain (30  $\mu\text{M}$ ), a known RNA polymerase inhibitor, is also shown. Error bars represent standard error of the mean ( $N = 4$ ), and only samples containing capistrain exhibited a statistically significant difference in fluorescent intensity. T-test was implemented for statistical analysis. \*\*\*,  $P = 0.0001$ .

#### Sequences for mycetolassin expression plasmids

##### *mlsA<sub>1</sub>*:

5'- atgaataagcagcaagacgtgaagcatgaagtgtcggattcctgttgatgacgaatcgctgatggaactgtccgctccgaatcgacgctgggc  
ggttcgggacaataaccgagaagctggcgttgccgcttttctga -3'

##### Intergenic region:

5'- catagggcgaccagccgctgctaccgggtagcggtttccttccactacgggatcaaggagattctc -3'

##### *mlsA<sub>2</sub>*:

5'- atgaataagcaacaagacgtgacgtatgaagtgtcgaactcctgttgacgatgaatcgctgatggaactgtgcgctccgagtcgacgctgggtg  
gtacggggcaatacaagaagctggcattggccgcttctatgatggagcgtaa -3'

##### Intergenic region:

5'- tcttagatgtattgtgacgcataactaaggtttgcttagcgttctctttagtcacgatacagaacaaaaa -3'

##### *mlsB*:



gttgaattacgtcagccgagtgctcggcagcccgtcggcattgagtgctaccaaaccggcgcttctgtgagcgaactctcgcgctacaagacag  
tgcgatgcgtgcaattatcgggctcttttgagcctcgcaccgattggtgctgaaatcgcggtcgtcggcatcgtcgtgttctcattgtttggcctcgtttatgc  
agctgtcttctggtgggttctgacctttatattactttagtgtatcaacggcgaaagcgtgtgaagcgtgcaacgcaagaaaaaccgagcgtcggatc  
gtcctctacgcggctggtcagacgacgccgatacggcgaagcgtttcgaatgaagccagcgaattgacctgactcgtcgtgttcaa  
aatgcgcgctggcgagtatccatatacgcgcaagatggaatcgttggcgcactcaattgctgattgctggatcgggttgaccacgcttacggctt  
tggcaggacaagatatctggcacaccggctcaccattggtgattcgtgctgttgaacagttacctgctgcgattactttgccgctcagcacgttcggctat  
gtgtgctgggaagttcagatcggttgttaactgtcggaaattgctgcacactatccgtttagatggcacttcgaaccgttgggtcctccccctttcaagca  
agcaccgtcgtgattgaatttcgacgcccagctttcccatccgtcggtagacgactgttgcaccacgcgaatftttcattcctgctggcgccttctgtgc  
gctggtggggccgagcggcggggaaatctacgctcatcaagctgttgttgcgctgtataagctcgtatgaaggcgaatccttatcgtatgataaacg  
atcgaatcgtttccgaatcgcagttgcgctcagtcgatcagttatgtacacaagacgcgcatttgcggatcgtcgtatccgcgaaacatctgctttgct  
gcccgaagccttaattcgaactgaacaagtatccattcctgtgcgctgacatccgttattgctcggcgagccagggcctggacacgccgattggc  
gagcgggcaacaaattgctgggtggtgaacgacaacgtgtgggactggcccgcgcttgttgcgcaatagccctttgctgctgttgacgaaccaact  
ggcgctcgtatgcacacacggagccgatatttcaagcatctctatgagcgttatcgtacaccacgcggctcgtgattgcgaccgactttcgcca  
ttcagcacgaggacttgattttggtcatgcaagaggggtcgtatcggagacgggcacgcatagtagtttgcggagcacaaggtgtttatgccaatctt  
ggcataaacagaccagctgtcgcagacaacaacctgacttgcagcggcagcagataa -3'

**Figure S19. Sequences of mycetolassin genetic constructs *mlsA<sub>1</sub>A<sub>2</sub>B*, *mlsC*, and *mlsD*.** The *mlsA<sub>1</sub>A<sub>2</sub>B* and *mlsC* constructs were purchased from GenScript and utilized to generate pAK343. To avoid rare codons from both *Burkholderia* sp. and *E. coli*, codons were swapped as follows: UUA → UUG, UCU → UCC, UCA → UCG, UAA → UGA, UGU → UGC, CUA → CUG, CCU → CCG, CCA → CCG, AUA → AUC, ACU → ACC, ACA → ACG, AGU → AGC, AGA → AGG, GUA → GUG. The native *mlsD* sequence was synthesized by Twist Bioscience and utilized in the pHNF010 and pHNF012 constructs. The native sequence originates from *Mycetohabitans* sp. (basonym *Burkholderia* sp.) B13 (NZ\_FTPM01000001). Accession codes for each gene are as follows: *A<sub>1</sub>*, WP\_175972411; *A<sub>2</sub>*, WP\_175972412; *B*, WP\_083705989; *C*, WP\_076785565; *D*, WP\_076785566.

## References

1. Maksimov, M. O.; Pelczer, I.; Link, A. J. Precursor-centric genome-mining approach for lasso peptide discovery. *Proc. Natl. Acad. Sci. U. S. A.* **2012**, *109*, 15223-15228.
2. Chekan, J. R.; Koos, J. D.; Zong, C.; Maksimov, M. O.; Link, A. J.; Nair, S. K. Structure of the lasso peptide isopeptidase identifies a topology for processing threaded substrates. *J. Am. Chem. Soc.* **2016**, *138*, 16452-16458.
3. Zong, C.; Wu, M. J.; Qin, J. Z.; Link, A. J. Lasso peptide benenodin-1 is a thermally actuated [1]rotaxane switch. *J. Am. Chem. Soc.* **2017**, *139*, 10403-10409.
4. Kodani, S.; Hemmi, H.; Miyake, Y.; Kaweewan, I.; Nakagawa, H. Heterologous production of a new lasso peptide brevunsin in *Sphingomonas subterranea*. *J. Ind. Microbiol. Biotechnol.* **2018**, *45*, 983-992.
5. Hegemann, J. D.; Zimmermann, M.; Zhu, S.; Klug, D.; Marahiel, M. A. Lasso peptides from proteobacteria: Genome mining employing heterologous expression and mass spectrometry. *Biopolymers* **2013**, *100*, 527-542.
6. Pan, S. J.; Rajniak, J.; Maksimov, M. O.; Link, A. J. The role of a conserved threonine residue in the leader peptide of lasso peptide precursors. *Chem. Commun.* **2012**, *48*, 1880-1882.
7. Knappe, T. A.; Linne, U.; Zirah, S.; Rebuffat, S.; Xie, X.; Marahiel, M. A. Isolation and structural characterization of capistruin, a lasso peptide predicted from the genome sequence of *Burkholderia thailandensis* E264. *J. Am. Chem. Soc.* **2008**, *130*, 11446-11454.
8. Kunakom, S.; Eustáquio, A. S. Heterologous production of lasso peptide capistruin in a *Burkholderia* host. *ACS Synth. Biol.* **2020**, *9*, 241-248.
9. Hegemann, J. D.; Zimmermann, M.; Xie, X.; Marahiel, M. A. Caulosegnins i-iii: A highly diverse group of lasso peptides derived from a single biosynthetic gene cluster. *J. Am. Chem. Soc.* **2013**, *135*, 210-222.
10. Cheung-Lee, W. L.; Parry, M. E.; Cartagena, A. J.; Darst, S. A.; James Link, A. Discovery and structure of the antimicrobial lasso peptide citrocin. *J. Biol. Chem.* **2019**, *294*, 6822-6830.
11. Metelev, M.; Arseniev, A.; Bushin, L. B.; Kuznedelov, K.; Artamonova, T. O.; Kondratenko, R.; Khodorkovskii, M.; Seyedsayamdost, M. R.; Severinov, K. Acinetodin and klebsidin, RNA polymerase targeting lasso peptides produced by human isolates of *Acinetobacter gyllenbergii* and *Klebsiella pneumoniae*. *ACS Chem. Biol.* **2017**, *12*, 814-824.
12. Fuwa, H.; Hemmi, H.; Kaweewan, I.; Kozaki, I.; Honda, H.; Kodani, S. Heterologous production of new lasso peptide koreensin based on genome mining. *J. Antibiot.* **2021**, *74*, 42-50.
13. Yu, H.; Ding, X.; Shang, L.; Zeng, X.; Liu, H.; Li, N.; Huang, S.; Wang, Y.; Wang, G.; Cai, S.; et al. Protective ability of biogenic antimicrobial peptide microcin J25 against enterotoxigenic *Escherichia coli*-induced intestinal epithelial dysfunction and inflammatory responses IPEC-J2 Cells. *Front. Cell. Infect. Microbiol.* **2018**, *8*, 242-242.
14. Li, Y.; Han, Y.; Zeng, Z.; Li, W.; Feng, S.; Cao, W. Discovery and bioactivity of the novel lasso peptide microcin y. *J. Agric. Food. Chem.* **2021**, *69*, 8758-8767.

15. Bratovanov, E. V.; Ishida, K.; Heinze, B.; Pidot, S. J.; Stinear, T. P.; Hegemann, J. D.; Marahiel, M. A.; Hertweck, C. Genome mining and heterologous expression reveal two distinct families of lasso peptides highly conserved in endofungal bacteria. *ACS Chem. Biol.* **2020**, *15*, 1169-1176.
16. Cheung-Lee, W. L.; Cao, L.; Link, A. J. Pandonodin: A proteobacterial lasso peptide with an exceptionally long c-terminal tail. *ACS Chem. Biol.* **2019**, *14*, 2783-2792.
17. Xiu, H.; Wang, M.; Fage, C. D.; He, Y.; Niu, X.; Han, M.; Li, F.; An, X.; Fan, H.; Song, L.; et al. Discovery and characterization of rubrinodin provide clues into the evolution of lasso peptides. *Biochemistry* **2022**, *61*, 595-607.
18. Cheung-Lee, W. L.; Parry, M. E.; Zong, C.; Cartagena, A. J.; Darst, S. A.; Connell, N. D.; Russo, R.; Link, A. J. Discovery of ubonodin, an antimicrobial lasso peptide active against members of the *Burkholderia cepacia* complex. *ChemBioChem* **2020**, *21*, 1335-1340.
19. Hegemann, J. D.; Zimmermann, M.; Zhu, S.; Steuber, H.; Harms, K.; Xie, X.; Marahiel, M. A. Xanthomonins I-III: A new class of lasso peptides with a seven-residue macrolactam ring. *Angew. Chem. Int. Ed. Engl.* **2014**, *53*, 2230-2234.
20. Si, Y.; Kretsch, A. M.; Daigh, L. M.; Burk, M. J.; Mitchell, D. A. Cell-free biosynthesis to evaluate lasso peptide formation and enzyme-substrate tolerance. *J. Am. Chem. Soc.* **2021**, *143*, 5917-5927.
21. Zallot, R.; Oberg, N.; Gerlt, J. A. The EFI web resource for genomic enzymology tools: Leveraging protein, genome, and metagenome databases to discover novel enzymes and metabolic pathways. *Biochemistry* **2019**, *58*, 4169-4182.
22. Kavan, D.; Man, P. MStools—web based application for visualization and presentation of HXMS data. *Int. J. Mass spectrom.* **2011**, *302*, 53-58.
